# Supplementary material for: Benchmarking imputation methods on real-world clinical time series with simulated spatio-temporal missingness
Source: Research Square preprint supplement (doi:10.21203/rs.3.rs-7263571/v1), 2025-09-01
Supplement: Supplementary file 1 [file 9eb9173365d375da5e2fdd42.xlsx]

## Sheet: Table B.1
Table B.1: Features presented in HIRID with corresponding variable Ids, X indicates that the feature is not used in this study for further analyis.
Feature	Variable ID	Description
HR	200
ABPs	100600	combined ABPs, NIBPs
ABPd	120620	combined ABPd, NIBPd
ABPm	110, 610	combined ABPm, NIBPm
CO	1000	cardiac output
SpO2	4000, 8280
RASS	15001565
Spitzendruck (Peak insp pressure)	3110
a_Lac	24000524
v-Lac	24000732, 24000485
INR	24000567
glucose	20005110, 24000523, 24000585
C-reactive protein	20002200
dobutamine	426
milrinone	1000232	Furosemide 10 mg/ml inj
levosimendan	1000606	Simdax
theophyllin	1001075	Doxyclin
static_Non-opioide	X
RelDatetime	X
static_Age	X
Temperature Central	410, 400
NIBPs	x	combined, otherwise 600
NIBPd	x	combined, otherwise 620
NIBPm	x	combined, otherwise 610
PAPm	160
PAPs	150
PAPd	170
PCWP	800
SvO2(m)	4200
ZVD	700, 15001441, 960
ST1	210
ST3	211
Rhythmus	X
ETCO2	2200, 8290, 30010009
RR	300, 310, 5685, 320	300 is double, should be filtered to observation
supplemental oxygen	15001555, 15001525
OUTurine/h	10020000	urine output
GCS Antwort	10000100
GCS Motorik	10000200
GCS AugenÃ¶ffnen	10000300
ICP	510, 15004303, 15001597
OUT	10010072, 10010070, 10010071	liquor output total
Incrys	30005075	crystalloid solution input, saline solution
Incolloid	30005080	Colloids solution input
FIO2	2010
Peep	2610	peep set and meas combined
Ventilator mode	X
TV	1000408	Tavanic
Plateaudruck	3200
AWPmean	3000	mean inspiratory airway pressure
RR set	X	combined with RR spontanious, othersie 320
AiwayCode	X
Haemofiltration	10002508
Liquor/h	10010020
Weight	X
a-BE	20001300	Base excess in Arterial blood by calculation
a_COHb	24000526	Carboxyhemoglobin/Hemoglobin.total in Arterial blood
a_Hb	24000548	Hemoglobin [Mass/volume] in Arterial blood
a_HCO3-	20004200	Bicarbonate [Moles/volume] in Arterial blood
a_MetHb	24000549	Methemoglobin/Hemoglobin.total in Arterial blood
a_pH	20000300	pH of Arterial blood
a_pCO2	20001200	Carbon dioxide [Partial pressure] in Arterial blood
a_PO2	20000200	Oxygen [Partial pressure] in Arterial blood
a_SO2	20000800	Oxygen saturation in Arterial blood
Zentral venÃ¶se sÃ¤ttigung	20001000, 24000737
Troponin-T	24000538, 24000806
creatine kinase	24000210
creatine kinase-MB	24000220
K+	20000500, 24000520, 24000833, 24000867
Na+	20040024
Ca2+ ionizied	24000522
phosphate	20002500
Mg	24000230
Urea	20004100
creatinine	20000600	in blood
ASAT	24000330	Aspartate aminotransferase [Enzymatic activity/volume] in Serum or Plasma
ALAT	20002600	Alanine aminotransferase [Enzymatic activity/volume] in Serum or Plasma
bilirubine, total	20004300
Bilirubin, direct	24000560
alkaline phosphatase	20002700
gamma-GT	24000370
aPTT	20004410
FII	24000536
glucose	20005110, 24000523, 24000585
albumin	24000605
Ammoniak'	24000568
lymphocyte	24000480
Segm. Neut.	24000556	segmented neurophils
Stabk. Neut.	24000557	band from neurophils
Hb	20000900, 24000836
platelet count	20000110
MCV	24000150
pH Liquor	24000608
Phosphat	20002500
Antiepileptica	1000756	Keppra, Levetiracetam
Muskelrelaxans	1000346	Esmeron / Rocoronium
epinephrine	71
Parkinson Medikaiton	1000371	dopamine antagonist Haldol
norepinephrine	1000462
vasodilatators	1000442	Loniten
ACE Inhibitors	1000415	zestril
Ca Antagonists	1000270	Norvasc
B-Blocker	1000596	choose Metoprolol
Others	X
Administriation of antibiotics	1000894	Coproxin
Propofol	1000692	not found use Fentanyl
Insulin Kurzwirksam	1000724	Insulin NovoRapid
Nimodipin	124	Nimotop
Opiate	1000937	Oxycontin
Steroids	1000486	Prednison
Thrombozytenhemmer	1000256	Aspirin
Heparin	1000373	Bichsel
static_Height	X

## Sheet: Table B.2
Table B.2: Hyperparameters for final model cofigurations.
MIMIC	SAE	MIDA	STGAE	GRUAE	LSTAE	BiLSTAE
#dimensions	[5,32,16,8,4]	[5,12,19,26]	[5,16,32]	[5,64]	[5,128]	[5,128]
#layers	5	3	2	1	1	1
learn rate	1e-06	1e-06	1e-06	0.0001	0.0001	1e-05
drop out	0.9	-	-	0.75	0.9	0.9
#epochs	30	20	30	120	134	143
batch size	64	64	32	64	64	64
HIRID
#dimensions	[5,128,64,32,16]	[5,12,19,26]	[5,64,32]	[5,128]	[5, 128]	[5, 64]
#layers	5	3	2		2	2
learn rate	0.0001	0.0001	1e-05	0.0001	0.0001	0.0001
drop out	0.75	-	-	0.9	0.9	0.5
#epochs	40	20	30	90	125	121
batch size	64	64	64	64	64	64
ICDEP
#dimensions	[5,32,16,8,4]	[5,12,19,26]	[5,16,32]	[5,64]	[5, 64]	[5, 64]
#layers	5	3	2	1	1	1
learn rate	1e-05	1e-05	1e-05	1e-05	1e-05	1e-05
drop out	0.75	-	-	0.9	0.75	0.9
#epochs	20	40	30	99	112	101
batch size	32	32	32	64	64	64

## Sheet: Table B.3
Table B.3: Model configurations for downstream transformer model.
MIMIC	TRANSFORMER
#hidden dimensions	64
#FFN dimensions	32
learn rate	0.0001
weight decay	0.1
#epochs	98
batch size	32
HIRID
#hidden dimensions	128
#FFN dimensions	32
learn rate	1e-05
weight decay	0
#epochs	111
batch size	64
ICDEP
#hidden dimensions	32
#FFN dimensions	32
learn rate	0.0001
weight decay	0.1
#epochs	96
batch size	32
